# Supplementary material for: Clinical and Molecular Features of Skin Malignancies in Muir-Torre Syndrome
Source: MDPI journal article supplement (doi:10.3390/genes12050781), 2021-05-20
Supplement: s1 [file s1]

**Table S1.** List of gene targets in the Oncomine Comprehensive Assay v3. (Thermo Fisher Scientific, Waltham, MA, USA)–161 gene panel.

| Hotspot genes |          | Full-length genes | Copy number genes | Gene fusions (inter- and intragenic) |
|---------------|----------|-------------------|-------------------|--------------------------------------|
| AKT1          | PIK3CA   | ATM               | AKT1              | ALK                                  |
| ALK           | PPP2R1A  | BAP1              | AR                | AXL                                  |
| AR            | PTPN11   | BRCA1             | CCND1             | BRAF                                 |
| ARAF          | RAC1     | BRCA2             | CCNE1             | EGFR                                 |
| BRAF          | RAF1     | CDKN2A            | CDK4              | ERBB2                                |
| BTB           | RET      | FBXW7             | CDK6              | ERG                                  |
| CBL           | RHEB     | MSH2              | EGFR              | ETV1                                 |
| CDK4          | RHOA     | NF1               | ERBB2             | ETV4                                 |
| CHEK2         | SF3B1    | NF2               | FGFR1             | ETV5                                 |
| CSF1R         | SMO      | NOTCH1            | FGFR2             | FGFR1                                |
| CTNNB1        | SPOP     | PIK3R1            | FGFR3             | FGFR2                                |
| DDR2          | SRC      | PTCH1             | FGFR4             | FGFR3                                |
| EGFR          | STAT3    | PTEN              | FLT3              | NTRK1                                |
| ERBB2         | U2AF1    | RB1               | IGF1R             | NTRK3                                |
| ERBB3         | XPO1     | SMARCB1           | KIT               | PDGFRA                               |
| ERBB4         | AKT2     | STK11             | KRAS              | PPARG                                |
| ESR1          | AKT3     | TP53              | MDM2              | RAF1                                 |
| EZH2          | AXL      | TSC1              | MDM4              | RET                                  |
| FGFR1         | CCND1    | TSC2              | MET               | ROS1                                 |
| FGFR2         | CDK6     | ARID1A            | MYC               | AKT2                                 |
| FGFR3         | ERCC2    | ATR               | MYCL              | AR                                   |
| FLT3          | FGFR4    | ATRX              | MYCN              | BRCA1                                |
| FOXL2         | H3F3A    | CDK12             | PDGFRA            | BRCA2                                |
| GATA2         | HIST1H3B | CDKN1B            | PIK3CA            | CDKN2A                               |
| GNA11         | MAP2K4   | CDKN2B            | PPARG             | ERBB4                                |
| GNAQ          | MDM4     | CHEK1             | TERT              | ESR1                                 |
| GNAS          | MYC      | CREBBP            | AKT2              | FGR                                  |
| HNF1A         | MYCN     | FANCA             | AKT3              | FLT3                                 |
| HRAS          | NTRK1    | FANCD2            | ALK               | JAK2                                 |
| IDH1          | NTRK2    | FANCI             | AXL               | KRAS                                 |
| IDH2          | PDGFRB   | MLH1              | BRAF              | MDM4                                 |
| JAK1          | PIK3CB   | MRE11A            | CCND2             | MET                                  |
| JAK2          | ROS1     | MSH6              | CCND3             | MYB                                  |
| JAK3          | SMAD4    | NBN               | CDK2              | MYBL1                                |
| KDR           | TERT     | NOTCH2            | CDKN2A            | NF1                                  |
| KIT           | TOP1     | NOTCH3            | CDKN2B            | NOTCH1                               |
| KNSTRN        |          | PALB2             | ESR1              | NOTCH4                               |
| KRAS          |          | PMS2              | FGF19             | NRG1                                 |
| MAGOH         |          | POLE              | FGF3              | NTRK2                                |
| MAP2K1        |          | RAD50             | NTRK1             | NUTM1                                |
| MAP2K2        |          | RAD51             | NTRK2             | PDGFRB                               |
| MAPK1         |          | RAD51B            | NTRK3             | PIK3CA                               |
| MAX           |          | RAD51C            | PDGFRB            | PRKACA                               |
| MED12         |          | RAD51D            | PIK3CB            | PRKACB                               |
| MET           |          | RNF43             | RICTOR            | PTEN                                 |
| MTOR          |          | SETD2             | TSC1              | RAD51B                               |
| MYD88         |          | SLX4              | TSC2              | RB1                                  |
| NFE2L2        |          | SMARCA4           |                   | RELA                                 |
| NRAS          |          |                   |                   | RSPO2                                |
| PDGFRA        |          |                   |                   | RSPO3                                |
|               |          |                   |                   | TERT                                 |

**References**

<https://assets.thermofisher.com/TFS-Assets/LSG/brochures/oncomine-comprehensive-assay-v3-flyer.pdf>
